# Supplementary material for: Synthesis and characterisation of a cancerous liver for presurgical planning and training applications
Source: PubMed Central journal article supplement — BMJ Open Gastroenterol. 2022 Jul 19;9(1):e000909. doi: 10.1136/bmjgast-2022-000909 (PMC9301799; doi:10.1136/bmjgast-2022-000909), 2022-07-19
Supplement: bmjgast-2022-000909supp003.pdf [file bmjgast-2022-000909supp003.pdf]

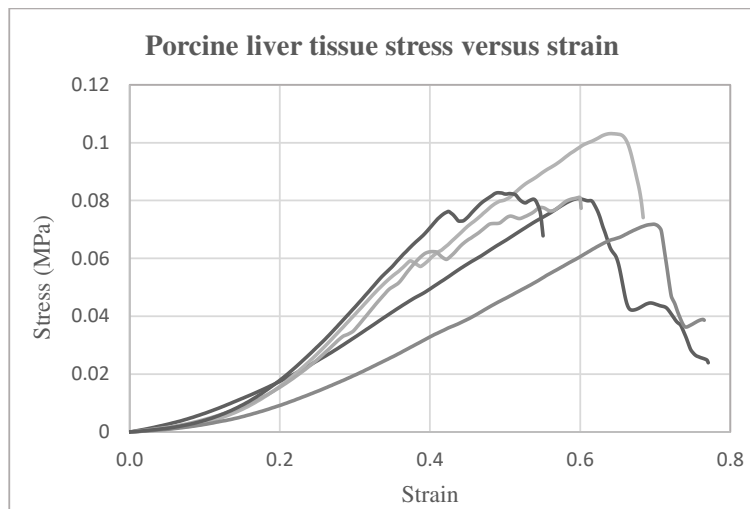

**Supplementary file 2.** The stress versus strain to failure curves for warmed (37°C), *ex-vivo* porcine liver tissue demonstrates ultimate tensile strength (UTS) characteristics for each sample. Each vector shows stress versus strain for five different specimens during uniaxial extension to failure. Non-linearity in the vector trajectory suggests heterogeneity of solid organ morphology. Peaks and troughs observed in some specimens, especially at higher strain rates, describe gradual specimen rupture during extension, possibly due to the presence of small vessels and ducts. Elastic modulus was determined using the rising slope of the first linear part of the deformation (0.02 – 0.08 stress values and within 0.2 – 0.4 strain range) after the initial 'toe' of the stress/strain curve.
