# Supplementary material for: Synthesis and characterisation of a cancerous liver for presurgical planning and training applications
Source: PubMed Central journal article supplement — BMJ Open Gastroenterol. 2022 Jul 19;9(1):e000909. doi: 10.1136/bmjgast-2022-000909 (PMC9301799; doi:10.1136/bmjgast-2022-000909), 2022-07-19
Supplement: bmjgast-2022-000909supp004.pdf [file bmjgast-2022-000909supp004.pdf]

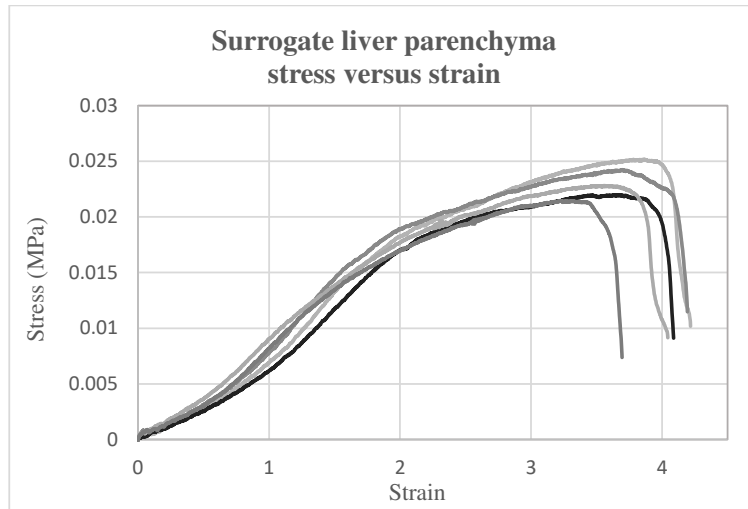

**Supplementary file 3.** The stress versus strain to failure curves for PDMS A10 with 300% oil. Results demonstrate ultimate tensile strength (UTS) characteristics for each sample. Each vector shows stress versus strain for five different specimens during uniaxial extension to failure. The smooth curves are characteristic of homogeneous materials while the non-linear trajectory suggest viscoelastic properties more akin to soft tissues rather than Hookean elastic materials that typically have a linear trajectory. Elastic modulus was ascertained using the rising slope of the first linear part of the deformation (0.006 – 0.02 stress values and within 1 – 1.7 strain range) after the initial 'toe' of the generated curve.
