# Supplementary material for: Synthesis and characterisation of a cancerous liver for presurgical planning and training applications
Source: PubMed Central journal article supplement — BMJ Open Gastroenterol. 2022 Jul 19;9(1):e000909. doi: 10.1136/bmjgast-2022-000909 (PMC9301799; doi:10.1136/bmjgast-2022-000909), 2022-07-19
Supplement: bmjgast-2022-000909supp005.pdf [file bmjgast-2022-000909supp005.pdf]

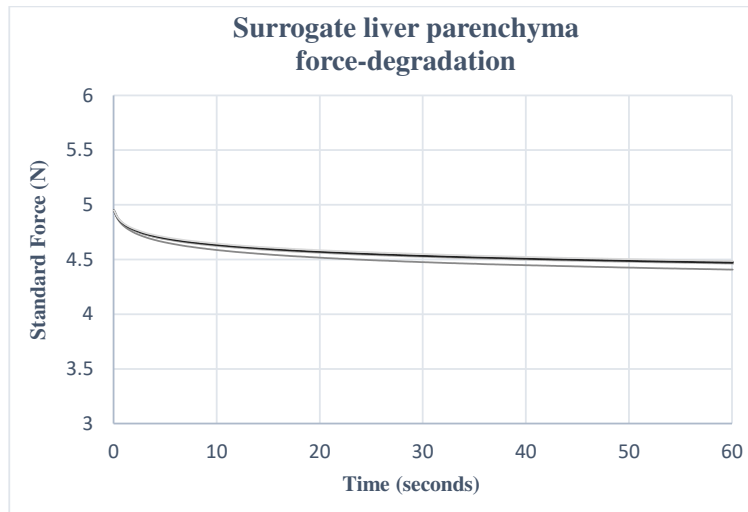

**Supplementary file 4.** The force degradation measures the energy loss for PDMS A10 with 300% oil surrogate over time. Vectors in this graph indicate the measured force degradation for five different specimens during multi-axial deformation at 5 Newton for 60 seconds. Specimens were evaluated using data collected while held for 60 seconds at a maximum force of 5 N during the 5<sup>th</sup> cycle. The force degraded by an average of 0.487N after 60 seconds, demonstrating a time dependant viscoelastic response to cyclic loading.
