# Supplementary material for: Synthesis and characterisation of a cancerous liver for presurgical planning and training applications
Source: PubMed Central journal article supplement — BMJ Open Gastroenterol. 2022 Jul 19;9(1):e000909. doi: 10.1136/bmjgast-2022-000909 (PMC9301799; doi:10.1136/bmjgast-2022-000909), 2022-07-19
Supplement: bmjgast-2022-000909supp007.pdf [file bmjgast-2022-000909supp007.pdf]

**Appendix 1- Table of results for indentation hardness by durometer (Appendix figure 1)**

Appendix figure 1

| <b>Porcine liver specimen tissue at 37°C, ambient temperature 14°C and 57% humidity</b>              |            |            |            |            |            |
|------------------------------------------------------------------------------------------------------|------------|------------|------------|------------|------------|
| Test site number                                                                                     | Specimen 1 | Specimen 2 | Specimen 3 | Specimen 4 | Specimen 5 |
| 1                                                                                                    | 17         | 18         | 20         | 27         | 24         |
| 2                                                                                                    | 20         | 20         | 33         | 17         | 13         |
| 3                                                                                                    | 24         | 14         | 24         | 19         | 18         |
| 4                                                                                                    | 15         | 23         | 30         | 33         | 22         |
| 5                                                                                                    | 26         | 28         | 27         | 24         | 34         |
| Arithmetic Mean (Rounded to the nearest decimal)                                                     | 20         | 21         | 27         | 24         | 22         |
| Specimen thickness                                                                                   | 16mm       | 15mm       | 14mm       | 14mm       | 15mm       |
| Arithmetic mean hardness (Rounded to the nearest decimal) = <b>23 H00</b>                            |            |            |            |            |            |
| Arithmetic mean spring force in Newtons = <b>4.87 N</b> (N=0.203 + 0.00908 X H00)                    |            |            |            |            |            |
| <b>Surrogate liver parenchyma specimen tissue at 21°C, ambient temperature 21°C and 60% humidity</b> |            |            |            |            |            |
| Test site number                                                                                     | Specimen 1 | Specimen 2 | Specimen 3 | Specimen 4 | Specimen 5 |
| 1                                                                                                    | 13         | 7          | 5          | 10         | 11         |
| 2                                                                                                    | 14         | 7          | 7          | 10         | 12         |
| 3                                                                                                    | 15         | 10         | 11         | 5          | 9          |
| 4                                                                                                    | 12         | 6          | 10         | 11         | 15         |
| 5                                                                                                    | 13         | 8          | 5          | 11         | 11         |
| Arithmetic Mean (Rounded to the nearest decimal)                                                     | 13         | 8          | 8          | 9          | 12         |
| Specimen thickness                                                                                   | 15mm       | 15mm       | 15mm       | 15mm       | 15mm       |
| Arithmetic mean hardness (Rounded to the nearest decimal) = <b>10 H00</b>                            |            |            |            |            |            |
| Arithmetic mean spring force in Newtons = <b>2.12 N</b> (N=0.203 + 0.00908 X H00)                    |            |            |            |            |            |
| <b>Surrogate liver blood vessel specimens at 21°C, ambient temperature 21°C and 60% humidity</b>     |            |            |            |            |            |
| Test site number                                                                                     | Specimen 1 | Specimen 2 | Specimen 3 | Specimen 4 | Specimen 5 |
| 1                                                                                                    | 45         | 44         | 38         | 44         | 45         |
| 2                                                                                                    | 45         | 45         | 43         | 45         | 44         |
| 3                                                                                                    | 45         | 45         | 41         | 44         | 44         |
| 4                                                                                                    | 45         | 43         | 44         | 44         | 45         |
| 5                                                                                                    | 44         | 44         | 44         | 43         | 46         |
| Arithmetic Mean (Rounded to the nearest decimal)                                                     | 44.8       | 44.2       | 42         | 44         | 44.8       |
| Specimen thickness                                                                                   | 15mm       | 15mm       | 15mm       | 15mm       | 15mm       |
| Arithmetic mean hardness (Rounded to the nearest decimal) = <b>44 H00</b>                            |            |            |            |            |            |
| Arithmetic mean spring force in Newtons = <b>9.33 N</b> (N=0.203 + 0.00908 X H00)                    |            |            |            |            |            |
