# Supplementary material for: Synthesis and characterisation of a cancerous liver for presurgical planning and training applications
Source: PubMed Central journal article supplement — BMJ Open Gastroenterol. 2022 Jul 19;9(1):e000909. doi: 10.1136/bmjgast-2022-000909 (PMC9301799; doi:10.1136/bmjgast-2022-000909), 2022-07-19
Supplement: bmjgast-2022-000909supp008.pdf [file bmjgast-2022-000909supp008.pdf]

**Appendix 2- Porcine liver parenchyma tissue tests (Appendix figure 2)**

Infrared images showing the temperature of the specimen during tests (T9). Temperature recorded in top left corner of each image displays the temperature within the circle of the crosshairs only.

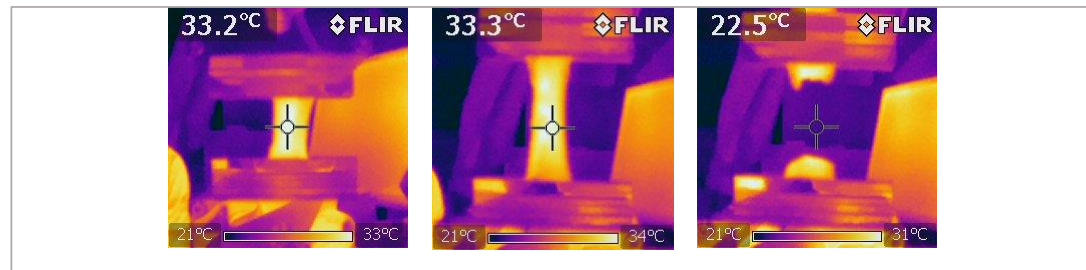**Porcine parenchyma specimen uniaxial extension test parameters**

|                                          |        |                                |       |           |     |                           |     |                             |
|------------------------------------------|--------|--------------------------------|-------|-----------|-----|---------------------------|-----|-----------------------------|
| <b>Ambient temperature</b>               | 24°C   |                                |       |           |     |                           |     |                             |
| <b>Ambient humidity</b>                  | 37%    |                                |       |           |     |                           |     |                             |
| <b>Specimen temperature degrees (°C)</b> |        | <b>Specimen thickness (mm)</b> |       |           |     | <b>Thermal image ref.</b> |     |                             |
| <b>T1</b>                                | 32.7   | <b>T6</b>                      | 33.1  | <b>T1</b> | 6.2 | <b>T6</b>                 | 7.6 | T2 thermal image 1491-149   |
| <b>T2</b>                                | 34     | <b>T7</b>                      | 31.7  | <b>T2</b> | 7   | <b>T7</b>                 | 5.7 | T4 thermal image 1493-1496  |
| <b>T3</b>                                | 33.5   | <b>T8</b>                      | 32.8  | <b>T3</b> | 7   | <b>T8</b>                 | 6.1 | T6 thermal image 1497-1499  |
| <b>T4</b>                                | 33.2   | <b>T9</b>                      | 33.3  | <b>T4</b> | 6.1 | <b>T9</b>                 | 9   | T7 thermal image 1500-1503  |
| <b>T5</b>                                | 32.3   | <b>T10</b>                     | 32.2  | <b>T5</b> | 6   | <b>T10</b>                | 5.7 | T8 thermal image 1504-1507  |
| <b>Specimen weight</b>                   |        |                                |       |           |     |                           |     | T10 thermal image 1507-1512 |
| <b>T1</b>                                | 15.2g  | <b>T6</b>                      | 22g   |           |     |                           |     |                             |
| <b>T2</b>                                | 24.9g  | <b>T7</b>                      | 25.5g |           |     |                           |     |                             |
| <b>T3</b>                                | 16.8g  | <b>T8</b>                      | 25g   |           |     |                           |     |                             |
| <b>T4</b>                                | 24.15g | <b>T9</b>                      | 23.4g |           |     |                           |     |                             |
| <b>T5</b>                                | 26g    | <b>T10</b>                     | 22g   |           |     |                           |     |                             |
