# Supplementary material for: Synthesis and characterisation of a cancerous liver for presurgical planning and training applications
Source: PubMed Central journal article supplement — BMJ Open Gastroenterol. 2022 Jul 19;9(1):e000909. doi: 10.1136/bmjgast-2022-000909 (PMC9301799; doi:10.1136/bmjgast-2022-000909), 2022-07-19

### Appendix 3- Graph of forces exerted during surgery (Appendix figure 3)

Liver surrogate model was placed on a force strain gauge (Zwick Roell Z2.5 tensile testing machine) to examine the forces exerted by the surgeon on the organ and surrounding soft tissues. A 200N load cell was inverted and the surrogate organ was placed on top and tared to remove the weight of the organ and cradle. The graph plot shows the forces exerted on the organ during organ delivery, palpation and surgical tumour exploration.

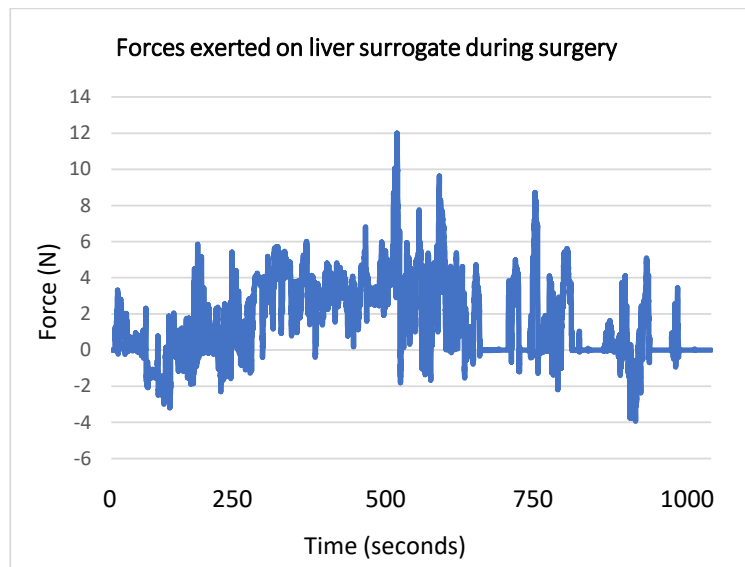

Supplement: bmjgast-2022-000909supp009.pdf [file bmjgast-2022-000909supp009.pdf]
